# Supplementary material for: 18F-Fluorodeoxyglucose Positron Emission Tomography Is Useful in the Evaluation of Prognosis in Retroperitoneal Sarcoma
Source: MDPI journal article supplement (doi:10.3390/cancers13184611), 2021-09-14
Supplement: s1 [file s1]

Article

# 18F-Fluorodeoxyglucose Positron Emission Tomography Is Useful in the Evaluation of Prognosis in Retroperitoneal Sarcoma

Toru Wakamatsu <sup>1,2,\*</sup>, Yoshinori Imura <sup>1,2</sup>, Hironari Tamiya <sup>1,2</sup>, Toshinari Yagi <sup>2</sup>, Naohiro Yasuda <sup>1</sup>, Sho Nakai <sup>1,2</sup>, Takaaki Nakai <sup>3</sup>, Hidetatsu Outani <sup>1</sup>, Kenichiro Hamada <sup>1</sup>, Shigeki Kakunaga <sup>3</sup>, Nobuhito Araki <sup>2</sup>, Takafumi Ueda <sup>3</sup> and Satoshi Takenaka <sup>1,2</sup>

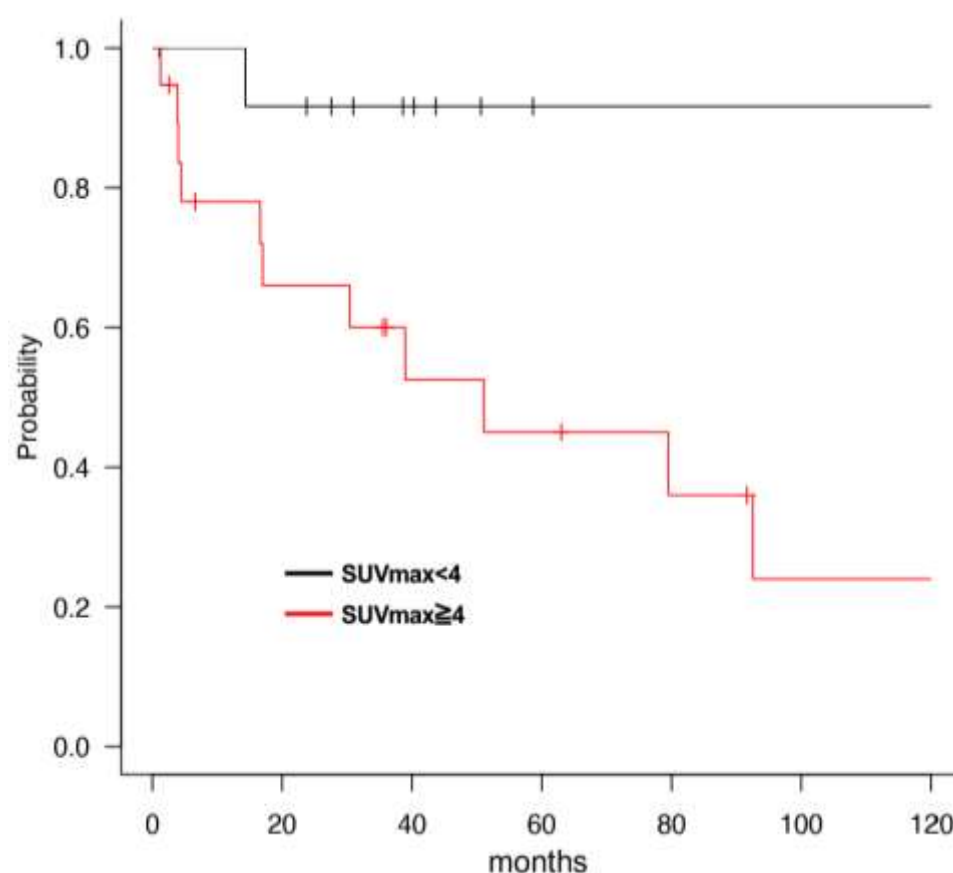

**Figure S1.** OS of RPS patients with SUVmax low (<4) or SUVmax high (≥4) in group of other.

Table S1. Analyses of survival in other patients.

| Variable                  |           | No. | Univariate analysis |            |         |
|---------------------------|-----------|-----|---------------------|------------|---------|
|                           |           |     | 5 year-OS (%)       | 95% CI (%) | P value |
| Age                       | 60>       | 17  | 59.2                | 23.7-82.6  | 0.882   |
|                           | 60≤       | 28  | 60.1                | 35.6-77.9  |         |
| Gender                    | Male      | 24  | 37.8                | 15.8-59.9  | 0.0214  |
|                           | Female    | 21  | 90                  | 65.6-97.4  |         |
| Metastasis at first visit | Yes       | 8   | NA                  | NA         | <0.001  |
|                           | No        | 37  | 66.8                | 44.2-82    |         |
| Tumor Grade               | 1         | 17  | 100                 | NA         | 0.00237 |
|                           | 2 and 3   | 23  | 29.9                | 10.8-51.9  |         |
| Tumor size                | <5cm      | 10  | 87.5                | 38.7-98.1  | 0.0184  |
|                           | ≥5cm      | 34  | 51.3                | 28.9-69.8  |         |
| Surgical resection        | Yes       | 26  | 66.6                | 37.4-84.5  | 0.0519  |
|                           | No        | 19  | 49.2                | 22.2-71.6  |         |
| Chemotherapy              | Yes       | 19  | 52.2                | 25.5-73.4  | 0.733   |
|                           | No        | 26  | 67.6                | 36.7-85.8  |         |
| Radiotherapy              | Yes       | 14  | 58.6                | 26.7-80.6  | 0.505   |
|                           | No        | 31  | 61.5                | 34.5-80.1  |         |
| SUVmax                    | Low (4>)  | 13  | 91.7                | 53.9-98.8  | 0.0276  |
|                           | High (4≤) | 19  | 45                  | 20.2-67.2  |         |

Table S2. Multivariate Cox regression model of OS in other.

| Covariates                            | multivariate analysis   |         |
|---------------------------------------|-------------------------|---------|
|                                       | HR (95% CI)             | P value |
| Age (60> vs 60≤)                      | 0.1522 (0.021251-0.91)  | 0.06103 |
| Gender (Male vs Female)               | 0.1168 (0.01079-1.264)  | 0.07718 |
| Metastasis at first visit (Yes vs No) | 23.1 (1.216-438.8)      | 0.03663 |
| Tumor Grade (1 vs 2 and 3)            | 2.071 (0.2277-18.84)    | 0.518   |
| Tumor size (<5cm vs ≥5cm)             | 0.7958 (0.1009-6.276)   | 0.8284  |
| Surgical resection (Yes or No)        | 0.1008 (0.01162-0.8741) | 0.03733 |
| Chemotherapy (Yes or No)              | 0.1908 (0.03451-1.055)  | 0.0576  |
| Radiotherapy (Yes or No)              | 0.5015 (0.06777-3.711)  | 0.4992  |
| SUVmax (4> vs 4≤)                     | 16.47 (0.5837-464.9)    | 0.1002  |
